# Supplementary material for: Hydrothermal Synthesis of CuO/RuO2/MWCNT Nanocomposites with Morphological Variants for High Efficient Supercapacitors
Source: MDPI journal article supplement (doi:10.3390/catal12010023), 2021-12-26
Supplement: s1 [file s1]

## Supplementary materials

# Hydrothermal Synthesis of CuO/RuO<sub>2</sub>/MWCNT Nanocomposites with Morphological Variants for High Efficient Supercapacitors

Yi-Chen Chung <sup>1,†</sup>, Ade Julistian <sup>1,†</sup>, Lakshmanan Saravanan <sup>1,2,\*</sup>, Peng-Ren Chen <sup>1</sup>, Bai-Cheng Xu <sup>1</sup>, Pei-Jie Xie <sup>1</sup> and An-Ya Lo <sup>1,\*</sup>

<sup>1</sup> Department of Chemical and Materials Engineering, National Chin-Yi University of Technology, Taichung 411030, Taiwan; zxczxazxsbnm@gmail.com (Y.-C.C.); ade.julistian@gmail.com (A.J.); b224466885@gmail.com (P.-R.C.); ples510777@gmail.com (B.-C.X.); eugene1779@gmail.com (P.-J.X.)

<sup>2</sup> Department of Micro and Nanoelectronics, Saveetha School of Engineering, Saveetha Institute of Medical and Technical Sciences (SIMATS), Thandalam 602105, Tamil Nadu, India

\* Correspondence: ljsaravanan08@gmail.com (L.S.); aylo@ncut.edu.tw (A.-Y.L.)

† These authors contributed equally to this work.

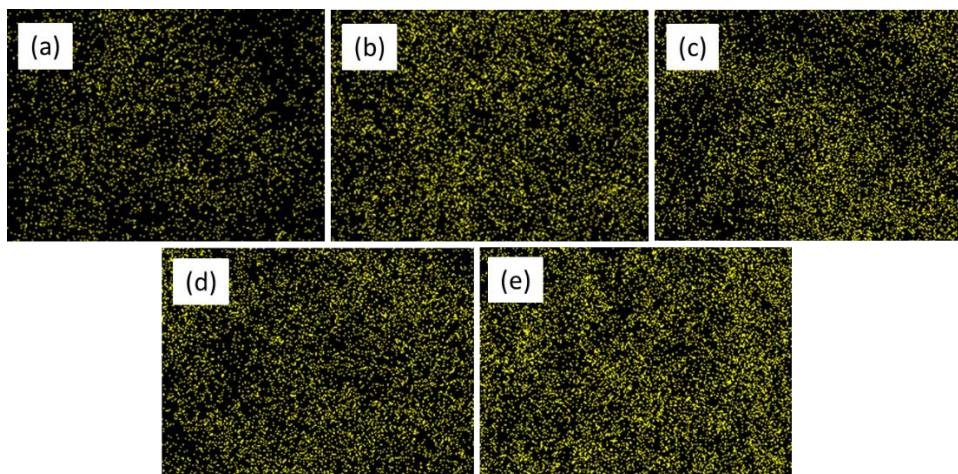

**Figure S1.** EDS-Mapping images of  $C_{35}R_yM$  electrodes with (a) 11, (b) 16, (c) 17, (d) 20, and (e) 23 wt% Ru.

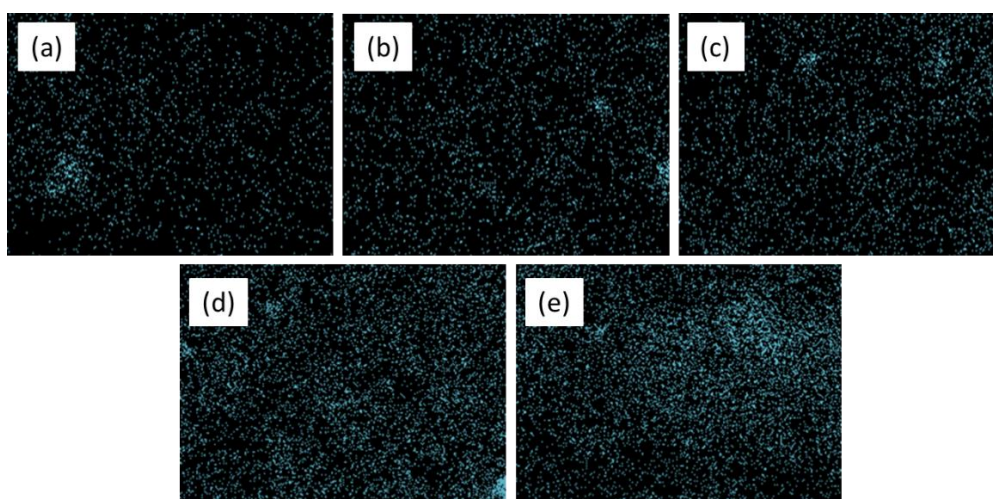

**Figure S2.** EDS mapping of  $C_xR_{20}M$  electrodes with (a) 7, (b) 8, (c) 9, (d) 10, and (e) 11 wt% Cu.

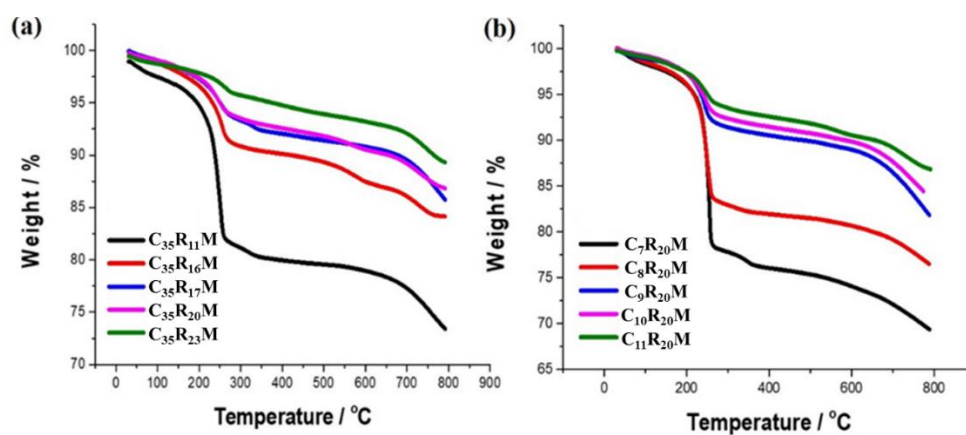

**Figure S3.** The TGA curves of (a) the  $C_{35}R_yM$  nanocomposites with various content of Ru and (b) the  $C_xR_{20}M$  nanocomposites with various content of Cu.

**Table S1.** The residual weight percentage and thermal stability of the  $C_{35}R_yM$  nanocomposites with various content of Ru.

| Specimen Designation | Ru content (%) | The residual weight % | Thermal stability (°C) |
|----------------------|----------------|-----------------------|------------------------|
| $C_{35}R_{11}M$      | 11             | 73.40                 | 755.24                 |
| $C_{35}R_{16}M$      | 16             | 84.14                 | 728.11                 |
| $C_{35}R_{17}M$      | 17             | 85.73                 | 785.70                 |
| $C_{35}R_{20}M$      | 20             | 86.83                 | 734.05                 |
| $C_{35}R_{23}M$      | 23             | 89.32                 | 744.43                 |

**Table S2.** The residual weight percentage and thermal stability of the  $C_xR_{20}M$  nanocomposites with various content of Cu.

| Specimen Designation | Ru content (%) | The residual weight % | Thermal stability (°C) |
|----------------------|----------------|-----------------------|------------------------|
| $C_7R_{20}M$         | 7              | 63.71                 | 735.27                 |
| $C_8R_{20}M$         | 8              | 73.89                 | 784.31                 |
| $C_9R_{20}M$         | 9              | 78.66                 | 752.01                 |
| $C_{10}R_{20}M$      | 10             | 81.42                 | 744.32                 |
| $C_{11}R_{20}M$      | 11             | 86.83                 | 734.12                 |

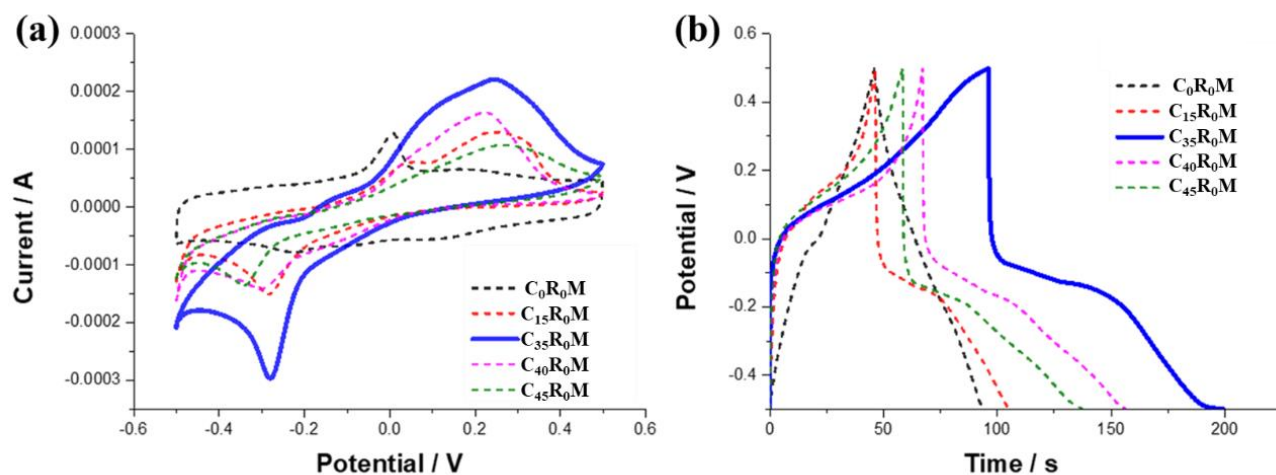

**Figure S4.** (a) CV curves of  $C_xR_0M$  electrodes with various Ru content, at a scan rate of  $10 \text{ mVs}^{-1}$ , (b) GCD curves of  $C_xR_0M$  electrodes with various Ru content, at a current density of  $1 \text{ Ag}^{-1}$ .

**Table S3.** The specific capacitance of the  $C_xR_0M$  electrodes valuated by CV curves and GCD curves, with various content of Cu.

| Specimen Designation | Cu content (%) | Specific Capacitance (F/g) by CV curves | Specific Capacitance (F/g) by GCD curves |
|----------------------|----------------|-----------------------------------------|------------------------------------------|
| $C_0R_0M$            | 0              | 45.31                                   | 46.80                                    |
| $C_{15}R_0M$         | 15             | 51.92                                   | 58.40                                    |
| $C_{35}R_0M$         | 35             | 104.71                                  | 103.50                                   |
| $C_{40}R_0M$         | 40             | 61.75                                   | 89.20                                    |
| $C_{45}R_0M$         | 45             | 52.10                                   | 78.70                                    |

**Table S4.** Comparison of electrochemical properties of  $CuO/RuO_2/MWCNT$  with samples reported in literature.

| Composite                   | Electrolyte        | Specific capacitances    | Current densities      | [Ref.]    |
|-----------------------------|--------------------|--------------------------|------------------------|-----------|
| $CuO/NTs$                   | 1 M $LiPF_6$       | 150 F /g                 | 1 A/ g                 | [36]      |
| $g-C_3N_4/CuO$              | 4 M KOH            | 95 F /g                  | 1 A/ g                 | [37]      |
| $CuONPs/MWCNTs$             | 0.5 M $Na_2SO_4$   | 221.66 F/g               | 10 mV                  | [38]      |
| $RuO_2-CNTS-CC$             | 1 M $H_2SO_4$      | 171.3 F/ g               | 10 mA/cm <sub>2</sub>  | [39]      |
| $RuO_2/MWNT$                | 3 M KCl            | 16.94 mF/cm <sub>2</sub> | 0.2 mA/cm <sub>2</sub> | [19]      |
| $CuCo_2O_4/CuO@RuO_2-2//AC$ | 10 mM $RuCl_3$     | 454.3 F /g               | 10 mA /cm <sub>2</sub> | [40]      |
| $CuO/RuO_2/MWCNT$           | 3 M $(NH_4)_2SO_4$ | 461.59 F/g               | 1 A/g                  | This work |

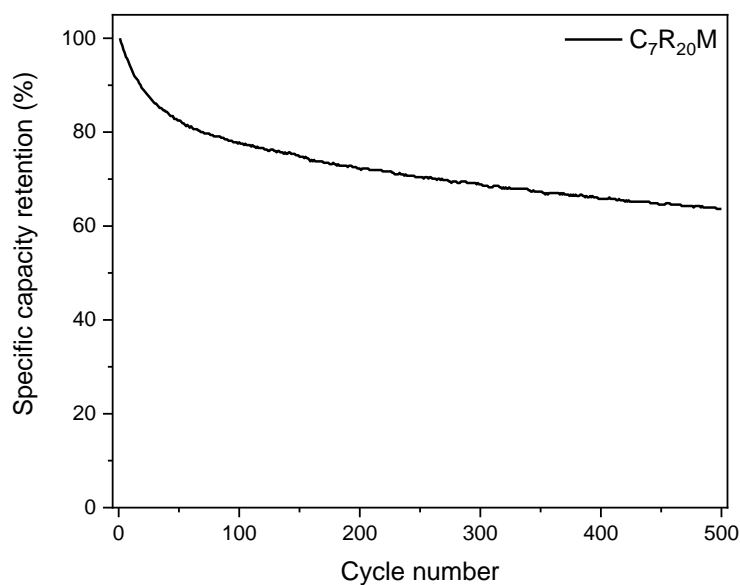

**Figure S5.** Cyclic stability test of  $C_7R_{20}M$  electrode.
